# 1 **Dependable Algorithm for Visualizing Snoring Duration through**

## 2 **Acoustic Analysis**

3

4 Hsueh-Hsin Kao<sup>1,2</sup>, Yen-Chang Lin<sup>3</sup>, Yee-Hsin Kao<sup>4</sup>, Madan Ho<sup>3</sup>, Hsiao-Chen Yu<sup>3</sup>,  
5 Chun-Lung Wang<sup>5,6\*</sup>, Jui-Kun Chiang<sup>7\*</sup>

6

7 <sup>1</sup>Graduate Institute of Medicine, College of Medicine, Kaohsiung Medical University,  
8 Kaohsiung 807, Taiwan

9 <sup>2</sup>Department of Laboratory Medicine, Kaohsiung Medical University Hospital,  
10 Kaohsiung 807, Taiwan

11 <sup>3</sup>Nature Dental Clinic, 341, Sec. 3, Zhongshan Rd., Puli Township, Nantou 545,  
12 Taiwan

13 <sup>4</sup>Department of Family Medicine, Tainan Municipal Hospital (Managed by Show  
14 Chwan Medical Care Corporation), 670 Chung-Te Road Tainan 701, Taiwan

15 <sup>5</sup>School of Medicine, Tzu Chi University, Hualien, Taiwan

16 <sup>6</sup>Division of Pediatrics, Dalin Tzu Chi Hospital, Buddhish Tzu Chi Medical  
17 Foundation, Dalin Chiayi, Taiwan

18 <sup>7</sup>Department of Family Medicine, Dalin Tzu Chi Hospital, Buddhist Tzu Chi Medical  
19 Foundation, 2, Minsheng Road, Dalin 62247, Chiayi, Taiwan

20

21 **Co-correspondant author:** Dr. Jui-Kun Chiang

22 Department of Family Medicine, Dalin Tzu Chi Hospital, Buddhist Tzu Chi Medical  
23 Foundation, 2, Minsheng Road, Dalin 62247, Chiayi, Taiwan

24 Phone Number: +886-9-75663325

25 Fax Number: +886-5-2648180

26 E-mail: [jkch68@gmail.com](mailto:jkch68@gmail.com)

27 **Running title:** Dependable algorithm to visualize snores

28

### 29 **Funding information**

30 JK Chiang received grants from the Dalin Tzu Chi Hospital, Buddhist Tzu Chi  
31 Medical Foundation (DTCRD108(2)-E-09).

32

33 **Words counts: Abstract:241, Text: 2388**

34 **Number of References: 23**

35

1 **Abstract**

2 **Background:** Snoring is a nuisance for the bed partners of people who snore and is  
3 also associated with chronic diseases. Estimating the snoring duration from a  
4 whole-night-sleep period is challenging. The authors present a dependable algorithm  
5 for visualizing snoring durations through acoustic analysis.

6 **Method:** Both instruments (Sony digital recorder and smartphone's SnoreClock app)  
7 were placed within 30 cm from the examinee's head during the sleep period.  
8 Subsequently, spectrograms were plotted based on audio files recorded from Sony  
9 recorders. The authors developed an algorithm to validate snoring durations through  
10 visualization of typical snoring segments.

11 **Results:** In total, 37 snoring recordings obtained from six individuals were analyzed.  
12 The mean age of the participants was  $44.6 \pm 9.9$  years. A 3-s segment demonstrated  
13 the typical dominant frequency bands and amplitude waves of two snores. Every  
14 recorded file was tailored to a regular 600-s segment and plotted. Visualization  
15 revealed that the typical features of the clustered snores in the amplitude domains  
16 were near-isometric spikes (most had an ascending–descending trend). The recorded  
17 snores exhibited one or more visibly fixed frequency bands. Intervals were noted  
18 between the snoring clusters and were incorporated into the whole-night snoring  
19 calculation. The correlative coefficients of snoring rates of digitally recorded files

1 examined by Examiners A and B were higher (0.865,  $p < 0.001$ ) than those with  
2 SnoreClock app (0.757,  $p < 0.001$ ; 0.787,  $p < 0.001$ , respectively).

3 **Conclusion:** A dependable algorithm with high reproducibility was developed for  
4 visualizing snoring durations.

5

6

7 **Keywords:** Snoring duration, Acoustic analysis, Smartphone app, Reproducibility

8

9

10

11

12

13

14

15

16

17

18

19

## 1 **1. Introduction**

2 Snoring, defined as snorting or grunting sounds during sleep, is caused by the  
3 vibration of soft tissues throughout the upper airway. Snoring is not only a nuisance  
4 for the bed partners but also associated with chronic diseases.[1] A study reported that  
5 the prevalence rate of chronic snoring is higher in adult men (40%) and lower in adult  
6 women (20%), although the variation is large.[2] The snoring prevalence is more than  
7 40% in Asian countries, including Taiwan (59.1%),[3] Malaysia (47.3%),[4] and  
8 Turkey (40.7%).[5] One of the reasons for varying snoring prevalence might be that  
9 people of Chinese descent tend to have narrower cranial bases and flatter midface  
10 structures than do people of other races.[6]

11 Studies have proposed the criteria that all snoring sounds measured through  
12 manual audio recording should have an audible oscillatory component and be  
13 synchronous with breathing and yet protuberant from background sounds. [7, 8]  
14 Generally, sounds have two characteristics: sound tone (frequency) and sound  
15 intensity (amplitude). Similarly, snoring can be defined through sound intensity and  
16 frequency. A study defined snoring as a breathing sound intensity of >25 dB.[9]  
17 Furthermore, typical breathing sound frequencies for snoring range from 110 to 190  
18 Hz, although frequencies even from 800 to 5000 Hz have been reported.[10-13]  
19 Therefore, some researchers have transferred collected audio data to Mel-frequency

1 cepstral coefficients and have used hidden Markov models to detect and monitor  
2 snoring by using audio data. The reported detection accuracy of snoring from using an  
3 ambient microphone range from 87% to 98%. [9, 10, 14, 15] However, the  
4 aforementioned studies were performed in sleep laboratories.

5 Subsequently, a study suggested a snoring epoch method for estimating snoring  
6 duration according to a threshold level of the maximum amplitude for every 30-s  
7 segment. A 30-s sleep epoch that contained three or more snoring signals was deemed  
8 a snoring epoch. The snoring duration was subsequently calculated as the sum of the  
9 snoring epoch \* 30 s. A shortcoming of this epoch method is that different threshold  
10 levels may output different results.[16] Another method for determining snoring  
11 duration is manual listening. However, this method might yield a large variation in  
12 results due to the difficulty of concentrating on hearing over a long period.

13 Snore apps are software applications that run on smartphones and record sound  
14 information-while the user is sleeping, and they have provided convenient and  
15 personalized sleep care.[17] With the progression of innovative monitoring mechanics  
16 and techniques, the apps can be used at home and examinations can be performed as  
17 often as every night without interruptions to the user's sleep. Studies have reported  
18 that the precision of smartphone apps for predicting snoring ranges from 93% to 96%,

1 although apps can vary greatly among smartphone models.[18] SnoreClock was one  
2 of smartphone applications and it has a high predictive value for snoring.[19]

3 In this study, the authors present a dependable algorithm for calculating snoring  
4 duration on the basis of the typical features of snoring frequency and amplitude and  
5 enable the visualization of snoring duration on a spectrogram. The authors compared  
6 the results of using our trusted method with those of using the home-based  
7 SnoreClock app.

8

## 9 **2. Materials and Methods**

### 10 **2.1 Study participants**

11 Six individuals with habitual snoring voluntarily participated in this study. The  
12 study was conducted over different periods at their respective homes in Taiwan.  
13 Informed consent was obtained from all participants in this study. The study protocol  
14 was reviewed and approved by the Research Ethics Committee of the Buddhist Dalin  
15 Tzu Chi Hospital in Taiwan (No. B10703013).

16 All participants placed their smartphones and digital recorders (Sony ICD-SX  
17 2000, Sony Electronics Inc., Tokyo, Japan) away from them yet within arm's reach  
18 before going to sleep. The smartphones and recorders were placed at the cranial side  
19 of the shoulder within 30 cm from the head to optimally record the snoring sounds of

1 patients. Snoring rates were then determined through measurement of snoring  
2 durations over the whole sleep period. In this study, the snoring durations were  
3 composed of snoring signals and interval pauses of no more than 100 s.

4

## 5 **2.2 Snoring rates obtained using our dependable algorithm**

6 The dependable algorithm was obtained through analysis of files obtained from  
7 Sony recorders. Snoring sounds throughout the night were recorded using portable  
8 digital sound recorders with linear pulse-code modulation (ICD-SX 2000, Sony  
9 Electronics Inc., Tokyo, Japan). The manufacturer of the sound recorder was not  
10 involved in this study. This recorder has two built-in high-performance electric  
11 dynamic microphones. These microphones were moved to a 90-degree “X-Y pattern.”  
12 The low-cut filter and limiter switches were set to the “OFF” position. The acquired  
13 audio signals were then digitalized at a sampling frequency of 44.1 kHz, PCM  
14 (pulse-code modulation), and 16 bits per sample. The authors subsequently moved  
15 these files to our computer for further evaluation. The files were records taken every  
16 600 s. Dominant frequencies for each 0.01-s segment were analyzed and plotted.  
17 Simultaneously, Hilbert amplitude envelopes were smoothed using a sample-moving  
18 average of 1000 samples with a 25% overlapping sliding window. [9, 10, 20, 21]

1       The R codes (R Foundation for Statistical Computing, Vienna, Austria) used are  
2       presented as follows.

3       To read the audio file (190402\_0310.wav in E disc, for example):

4       `>library(tuneR)`

5       `>file.1 <- readWave("E:/190402_0310.wav")`

6       To cut the file into 600-s segments:

7       `>file.1.600sec <- cutw(file.1, from =0, to=600, output="Wave")`

8       The first part of the 600-s segment was, for example:

9       For the frequency domain:

10      `>df.plot <- dfreq(file.600sec.1, at = seq(1, 599, by = 0.01 ))`

11      For the amplitude domain:

12      `>amp.plot <- timer(file.600sec.1, threshold=70, msmooth=c(1000,25), dmin=0.001,`

13                      `envt="hil", plot=TRUE)`

14      Visualization revealed that the clustered snores in the amplitude domains

15      generally exhibited near-isometric spikes with a trend of initial ascension and

16      subsequent descension. Moreover, the frequency domains of the snoring records

17      exhibited one or more visibly fixed frequency bands. Thus, the authors combined the

18      correspondent two figures (matched amplitude domains and frequency domains) as

19      snoring clusters. Notably, intervals (no more than 100 s) lay between the snoring



1 clusters, and they were both incorporated into the whole-night snoring duration. Plots  
2 with typical amplitude domains and frequency domains classified as snoring that did  
3 not meet our criteria were classified as “noises”. For the aforementioned reasons, the  
4 authors set these guidelines, which enabled visualization of snoring durations. To test  
5 the reproducibility of the method of calculating snoring duration by using Sony digital  
6 recorders, two researches thoroughly examined the digitally recorded files.

7 The “noise” patterns did not possess the aforementioned typical features of  
8 snoring sounds. Therefore, the authors could easily differentiate noises (e.g., those  
9 from a fan, an air-conditioner, a toilet, outdoors, coughing, and groaning) from  
10 genuine snoring sounds. In the case that snoring durations were ambiguous, the  
11 authors carefully listened to the recorded files for confirmation.

12

### 13 **2.3 Determining snoring rates by using smartphone apps**

14 Because smartphone apps are accessible and portable, the SnoreClock app for  
15 smartphones was used. The snoring rates were displayed on the screens of  
16 smartphones. The developers of SnoreClock app were not involved in this study.

17 The authors could visualize typical snoring durations according to the typical  
18 frequency and amplitude of snoring on spectrograms. All snoring durations were  
19 summed, and snoring rates were determined.

1

## 2 **2.4 Statistical analysis**

3 The R statistical software, version 3.4.1, was used for all statistical analyses. The  
4 seewave package for R was applied. Hilbert amplitude envelopes were smoothed  
5 using a sample movement average of 1000 samples, with a 25% overlapping sliding  
6 window based on the timers' function. Dominant frequencies were processed every  
7 0.01 s through fast Fourier transform using the dfreq function of the R package.

8 Statistical significance was set at  $p < 0.05$ , and all tests were two-tailed.

9 Continuous variables were presented as mean  $\pm$  standard deviation where t-test or  
10 Wilcoxon test were indicated by cases. Correlation analysis was performed to  
11 evaluate associations in snoring rates between methodologies and examiners.  
12 ANOVA was used to test the differences between three groups of continuous  
13 variables.

14

## 15 **3. Results**

16 In total, 37 recordings from six participants (two female and four male) were  
17 used for the analysis. Their mean age was  $44.6 \pm 9.9$  years. The mean recording time  
18 was  $5.73 \pm 1.18$  h. (Table 1) The sound files captured with a digital recorder were  
19 transferred to a computer for analysis. The depicted bands of typical snoring

1 frequency could vary during the recording period at the intraindividual and  
2 interindividual level. A 3-s period demonstrated the dominant frequency bands and  
3 amplitude spikes of the typical snoring duration. The three mean frequency bands of  
4 snoring presented on spectrograms were 4694, 2713, and 1083 Hz. The fourth mean  
5 frequency band of snoring was hidden in background noise (Figure 1). Every recorded  
6 file was segmented at 600-s (10 min) intervals. The dominant frequencies for every  
7 0.01 s were calculated through fast Fourier transformation and plotted, and the Hilbert  
8 amplitude envelopes were plotted as well. Under this time scale, the matched 10-min  
9 plots of frequency bands and amplitude spikes were combined to estimate snoring  
10 durations. Isometric spikes (amplitude domain) that formed during participants'  
11 snoring and that were as long as the fixed frequency bands (frequency domain) were  
12 paired and then grouped into isolated clusters, generally at intervals (typically less  
13 than 100 s). Therefore, the repeated “cluster–interval–cluster–interval” pattern must  
14 be identified to calculate snoring duration while “noises” are simultaneously excluded.  
15 The amplitudes could vary with time. Figure 2 shows an example of the typical  
16 duration of a 600-s (10 min) snore. The entire snoring duration was composed of  
17 summed interspersed signals and intervals (typically less than 100 s). Noises (such as  
18 those from walking, shifting position in bed, doors opening or closing, waterflow,

1 talking, and curtains opening or closing) did not have typically featured fixed  
2 frequency bands and repeated amplitudes (Figure 3).

3 In this study, men had significantly greater snoring durations and rates than did  
4 women. To test for the reproducibility of our algorithm in calculating snoring  
5 durations, the authors examined the files digitally recorded by Examiners A and B.  
6 The differences in the scatterplots of snoring rates between those produced by the  
7 SnoreClock app and those obtained by Examiners A and B are shown in Figures 4a–c.  
8 The correlative coefficient of snoring rates calculated by Examiners A and B was  
9 0.865 ( $p < 0.001$ ), which is higher than that calculated by the SnoreClock app (Table  
10 2). The difference between the means of snoring rates calculated by the two  
11 examiners was small. Additionally, both examiners obtained values that were lower  
12 than those obtained by the SnoreClock app. However, the three calculated  
13 snoring-rate values exhibited no statistically significant difference ( $p = 0.738$ ; Figure  
14 5).

15

#### 16 **4. Discussion**

17 In the current study, snoring duration was determined according to signals and  
18 intervals (typically within 100 s). The featured signals of snores in the amplitude  
19 domains shared a similar ascension–descension pattern. Through Hilbert

1 transformation, each individual ascension–descension snoring signal unit was  
2 processed to identify individual spikes, which were subsequently grouped to form  
3 near-isometric spike clusters. The intervals between clustered spikes were then  
4 determined. In the frequency domain, one or more fixed corresponding frequency  
5 bands in the snoring signals were also observed.

6 In this study, the authors could visualize snoring durations according to typical  
7 spectrograms from the audio files and thereby calculate the duration of snoring for  
8 each file. Noise patterns were easily identified and visualized because of their  
9 differences from the aforementioned typical features of snoring. With the use of a  
10 digital recorder at 44.1 kHz and R software, this dependable algorithm can be reliably  
11 used again. The correlation coefficient of snoring rates calculated by Examiners A  
12 and B was higher than that calculated by the SnoreClock app. The difference between  
13 the mean snoring rates calculated by the two examiners (A or B) and the SnoreClock  
14 app was small and statistically nonsignificant ( $p = 0.738$ ). Therefore, people with  
15 habitual snoring can reliably use smartphone apps, such as SnoreClock, to determine  
16 rates of snoring duration at home.

17 For validation of snoring sounds, the acquired audio files were digitalized at a  
18 sampling frequency of 44.1 kHz, PCM, and 16 bits per sample, in accordance with  
19 previous research.[9] In Dafna’s study, all audio files were downsampled to 16 kHz,

1 and each audio file underwent an adaptive noise suppression process based on the  
2 Wiener filter. Accordingly, they could detect snoring sounds with an accuracy of  
3 >98%.[9] However, the authors did not perform down sampling, and the noise  
4 durations presented were not suppressed. In our study, the authors validated snoring  
5 sounds on the spectrogram by identifying matching typical amplitude and frequency  
6 domains. Snoring signals generally exhibited one or more discrete frequency bands,  
7 and their spiked amplitudes occurred in groups at characteristic near-isometric  
8 intervals. Our dependable algorithm can be considered reliable for detecting snoring  
9 durations through visualization.

10 The analysis of snoring through audio recording with a microphone was applied  
11 and serves as a convenient option. Studies have reported the advantages of audio  
12 recording as its unobtrusiveness, portability, and low cost. [14, 22] However, data sets  
13 of audio recordings require further analysis to define snoring durations because this  
14 algorithm is inaccessible for people who did not have R software applications.

15 Smartphone apps provide convenient and personalized sleep care, and their  
16 accuracy in predicting snoring rates ranges from 93% to 96%.[18] Nevertheless,  
17 snoring does not have fixed and constant audio characteristics; the authors compared  
18 the rates of snoring durations between smartphone apps and sound recorders. Studies  
19 have reported that snoring duration measurements obtained using smartphone apps are

1 highly similar with those obtained through polysomnography.[23] In the current  
2 study, the authors compared the spectrograms of audio files obtained using a  
3 smartphone app (SnoreClock) with those obtained using the proposed dependable  
4 algorithm for detecting snoring duration.

#### 5 **4.1 Limitation**

6 This study has the following limitations. First, because of the small sample size  
7 of 36 files from six subjects, further study with a large sample size is warranted to  
8 confirm the results. Second, the time spent before falling asleep was not omitted;  
9 therefore, the rates of snoring durations may have been underestimated. Finally,  
10 snoring apps might be unable to distinguish between snoring sounds from different  
11 individuals in the same room.

12

#### 13 **5. Conclusion**

14 The examiners determined a higher correlation than those between the  
15 SnoreClock app's calculation and digitally recorded files (by a Sony recorder).  
16 Smartphone apps, such as SnoreClock, may provide a dependable algorithm that can  
17 be conveniently used at home to measure snoring rates. In the present study, the  
18 authors provide a truly dependable algorithm for detecting snoring sounds for  
19 researchers interested in investigating snoring.

1 **Competing interests**

2 The authors declare that they have no competing interests.

3

4 **Author Contributions**

5 **Conceptualization:** Hsueh-Hsin Kao, Yen-Chang Lin, Yee-Hsin Kao, Chun-Lung  
6 Wang, Jui-Kun Chiang

7 **Data curation:** Yen-Chang Lin, Madan Ho, Hsiao-Chen Yu, Jui-Kun Chiang

8 **Formal analysis:** Jui-Kun Chiang

9 **Funding acquisition:** Jui-Kun Chiang

10 **Investigation:** Hsueh-Hsin Kao, Yee-Hsin Kao

11 **Methodology:** Yee-Hsin Kao, Jui-Kun Chiang

12 **Project administration:** Yee-Hsin Kao, Jui-Kun Chiang

13 **Resources:** Jui-Kun Chiang

14 **Supervision:** Hsueh-Hsin Kao, Yee-Hsin Kao, Jui-Kun Chiang

15 **Validation:** Yee-Hsin Kao, Jui-Kun Chiang

16 **Visualization:** Hsueh-Hsin Kao, Jui-Kun Chiang

17 **Writing – original draft:** Hsueh-Hsin Kao, Yee-Hsin Kao, Jui-Kun Chiang

18 **Writing – review & editing:** Hsueh-Hsin Kao, Chun-Lung Wang, Yee-Hsin Kao,  
19 Jui-Kun Chiang. Hsueh-Hsin Kao and Yee-Hsin Kao contributed equally. Chun-Lung  
20 Wang and Jui-Kun Chiang were the co-respondent authors.

21

22

23

24

25

26

27

28

29

30

31

32

33

34

35

36



1 **Figure Legends:**

2 Figure 1. Example of a 3-s audio signal indicating snoring.

3

4 The spectrogram of frequency (upper): three mean frequency bands of snoring (4694,

5 2713, and 1083 Hz) on the spectrogram; the fourth mean frequency band of snoring

6 was hidden in background noise. The amplitude of snoring (bottom): the amplitude

7 exhibited an ascension–descension pattern.

8

9

10 Figure 2. Example of snore interpretation by using the frequency domain and

11 amplitude domain.

12

13 A 600-s typical snoring duration including signals and intervals. The graph shows

14 grouped near-isometric spikes with specific corresponding frequency bands. The

15 clustered spikes exhibit a unique ascension–descension pattern regarding its

16 amplitude, with intervals (typically less than 100 s) in between.

17

18

19 Figure 3. Examples of noises such as those from walking, changing position, doors

20 opening or closing.

21

22

1 Figure 4. Scatterplots of snoring rates detected using the SnoreClock app and digital

2 recorder files, as interpreted by Examiners A and B.

3

4

5 Figure 5. Boxplot showing snoring rates detected using the SnoreClock app and

6 digital recording files, as interpreted by Examiners A and B.

7

8

9

10

11

12

13

14

15

16

17

18

19

20

21

22

23

24

25

26

27

28

29

30

31

32

33

34

1 Table 1. The demographics of subjects

| Variable                       | Total     | Female    | Male      | <i>p</i> value |
|--------------------------------|-----------|-----------|-----------|----------------|
| Male/female                    | 6         | 2         | 4         |                |
| Total recording files          | 37        | 9         | 28        |                |
| Age, years                     | 44.6±9.9  | 47±5.7    | 43.0±13.1 | 1              |
| Recording time, hours          | 5.73±1.18 | 6.16±1.69 | 5.59±0.96 | 0.358          |
| Snoring time, minutes          |           |           |           |                |
| By smartphone app              | 63.8±36.6 | 36.3±36.6 | 72.6±32.5 | 0.008          |
| Digital recorder by examiner A | 58.9±42.6 | 29.6±25.3 | 68.4±43.0 | 0.015          |
| Digital recorder by examiner B | 59.1±40.5 | 25.9±21.0 | 69.8±39.6 | 0.003          |
| Snoring rates, %               |           |           |           | 0.738          |
| By smartphone app              | 19.6±11.8 | 11.1±13.1 | 22.3±10.2 | 0.008          |
| Digital recorder by examiner A | 18.8±15.0 | 9.6±11.0  | 21.7±15.1 | 0.019          |
| Digital recorder by examiner B | 18.5±13.6 | 8.4±9.0   | 21.8±13.3 | 0.008          |

2  
3  
4  
5  
6  
7  
8  
9  
10  
11  
12  
13  
14  
15  
16  
17  
18  
19  
20  
21  
22  
23  
24  
25

1 Table 2. Correlation of snoring rates by different methods

---

|            | By SnoreClock app | Examiner A    |
|------------|-------------------|---------------|
| Examiner A | 0.757 (<0.001)    | -             |
| Examiner B | 0.787 (<0.001)    | 0.865(<0.001) |

---

2 \*Values presented: coefficient of correlation (*p* value)

3

4

5

6

7

8

9

10

11

12

13

14

15

16

17

18

19

20

21

22

23

24

25

26

27

28

29

30

## 1 **References:**

- 2 1. Yunus FM, Khan S, Mitra DK, Mistry SK, Afsana K, Rahman M. Relationship  
3 of sleep pattern and snoring with chronic disease: findings from a nationwide  
4 population-based survey. *Sleep Health* 2018;4(1):40-48.  
5 <https://doi.org/10.1016/j.sleh.2017.10.003>. PMID: 29332678.
- 6 2. Hoffstein V. Apnea and snoring: state of the art and future directions. *Acta*  
7 *Otorhinolaryngol Belg* 2002;56(2):205-236. PMID: 12092331.
- 8 3. Chuang LP, Hsu SC, Lin SW, Ko WS, Chen NH, Tsai YH. Prevalence of  
9 snoring and witnessed apnea in Taiwanese adults. *Chang Gung Med J*  
10 2008;31(2):175-181. PMID: 18567418.
- 11 4. Kamil MA, Teng CL, Hassan SA. Snoring and breathing pauses during sleep in  
12 the Malaysian population. *Respirology* 2007;12(3):375-380.  
13 <https://doi.org/10.1111/j.1440-1843.2007.01030.x>. PMID: 17539841.
- 14 5. Kart L, Dutkun Y, Altin R, Ornek T, Kiran S. Prevalence of major obstructive  
15 sleep apnea syndrome symptoms in coal miners and healthy adults. *Tuberk Toraks*  
16 2010;58(3):261-267. PMID: 21038136.
- 17 6. Lam B, Ip MS, Tench E, Ryan CF. Craniofacial profile in Asian and white  
18 subjects with obstructive sleep apnoea. *Thorax* 2005;60(6):504-510.  
19 <https://doi.org/10.1136/thx.2004.031591>. PMID: 15923252.
- 20 7. Arnardottir ES, Isleifsson B, Agustsson JS, Sigurdsson G, Sigurgunnarsdottir  
21 MO, Sigurdarson GT, et al. How to measure snoring? A comparison of the  
22 microphone, cannula and piezoelectric sensor. *J Sleep Res* 2016;25(2):158-168.  
23 <https://doi.org/10.1111/jsr.12356>. PMID: 26553758.
- 24 8. Bloch KE, Li Y, Sackner MA, Russi EW. Breathing pattern during sleep  
25 disruptive snoring. *Eur Respir J* 1997;10(3):576-586. PMID: 9072988.
- 26 9. Dafna E, Tarasiuk A, Zigel Y. Automatic detection of whole night snoring  
27 events using non-contact microphone. *PLoS One* 2013;8(12):e84139.  
28 <https://doi.org/10.1371/journal.pone.0084139>. PMID: 24391903.
- 29 10. Cavusoglu M, Kamasak M, Erogul O, Ciloglu T, Serinagaoglu Y, Akcam T. An  
30 efficient method for snore/nonsnore classification of sleep sounds. *Physiol Meas*  
31 2007;28(8):841-853. <https://doi.org/10.1088/0967-3334/28/8/007>. PMID: 17664676.
- 32 11. Pevernagie D, Aarts RM, De Meyer M. The acoustics of snoring. *Sleep Med Rev*  
33 2010;14(2):131-144. <https://doi.org/10.1016/j.smr.2009.06.002>. PMID: 19665907.
- 34 12. Fiz JA, Abad J, Jane R, Riera M, Mananas MA, Caminal P, et al. Acoustic  
35 analysis of snoring sound in patients with simple snoring and obstructive sleep  
36 apnoea. *Eur Respir J* 1996;9(11):2365-2370.  
37 <https://doi.org/10.1183/09031936.96.09112365>. PMID: 8947087.
- 38 13. Perez-Padilla JR, Slawinski E, Difrancesco LM, Feige RR, Remmers JE,

- 1 Whitelaw WA. Characteristics of the snoring noise in patients with and without  
2 occlusive sleep apnea. *Am Rev Respir Dis* 1993;147(3):635-644.  
3 <https://doi.org/10.1164/ajrccm/147.3.635>. PMID: 8442599.
- 4 14. Duckitt WD, Tuomi SK, Niesler TR. Automatic detection, segmentation and  
5 assessment of snoring from ambient acoustic data. *Physiol Meas*  
6 2006;27(10):1047-1056. <https://doi.org/10.1088/0967-3334/27/10/010>. PMID:  
7 16951463.
- 8 15. Azarbarzin A, Moussavi ZM. Automatic and unsupervised snore sound  
9 extraction from respiratory sound signals. *IEEE Trans Biomed Eng*  
10 2011;58(5):1156-1162. <https://doi.org/10.1109/TBME.2010.2061846>. PMID:  
11 20679022.
- 12 16. Lee SA, Amis TC, Byth K, Larcos G, Kairaitis K, Robinson TD, et al. Heavy  
13 snoring as a cause of carotid artery atherosclerosis. *Sleep* 2008;31(9):1207-1213.  
14 PMID: 18788645.
- 15 17. Shin H, Choi B, Kim D, Cho J. Robust sleep quality quantification method for a  
16 personal handheld device. *Telemed J E Health* 2014;20(6):522-530.  
17 <https://doi.org/10.1089/tmj.2013.0216>. PMID: 24693921.
- 18 18. Camacho M, Robertson M, Abdullatif J, Certal V, Kram YA, Ruoff CM, et al.  
19 Smartphone apps for snoring. *J Laryngol Otol* 2015;129(10):974-979.  
20 <https://doi.org/10.1017/S0022215115001978>. PMID: 26333720.
- 21 19. Chiang JK, Lin YC, Lin CW, Ting CS, Chiang YY, Kao YH. Validation of  
22 snoring detection using a smartphone app. *Sleep Breath*. 2021 Apr 3.  
23 <https://doi.org/10.1007/s11325-021-02359-3>. PMID: 33811634.
- 24 20. Lee GS, Lee LA, Wang CY, Chen NH, Fang TJ, Huang CG, et al. The  
25 Frequency and Energy of Snoring Sounds Are Associated with Common Carotid  
26 Artery Intima-Media Thickness in Obstructive Sleep Apnea Patients. *Sci Rep*  
27 2016;6:30559. <https://doi.org/10.1038/srep30559>. PMID: 27469245.
- 28 21. Shiomi FK, Pisa IT, Campos CJ. Computerized analysis of snoring in sleep  
29 apnea syndrome. *Braz J Otorhinolaryngol* 2011;77(4):488-498.  
30 <https://doi.org/10.1590/S1808-86942011000400013>. PMID: 21860976.
- 31 22. Lee BW, Hill PD, Osborne J, Osman E. A simple audio data logger for objective  
32 assessment of snoring in the home. *Physiol Meas* 1999;20(2):119-127.  
33 <https://doi.org/10.1088/0967-3334/20/2/001>. PMID: 10390014.
- 34 23. Nakano H, Hirayama K, Sadamitsu Y, Toshimitsu A, Fujita H, Shin S, et al.  
35 Monitoring sound to quantify snoring and sleep apnea severity using a smartphone:  
36 proof of concept. *J Clin Sleep Med* 2014;10(1):73-78.  
37 <https://doi.org/10.5664/jcsm.3364>. PMID: 24426823.
- 38

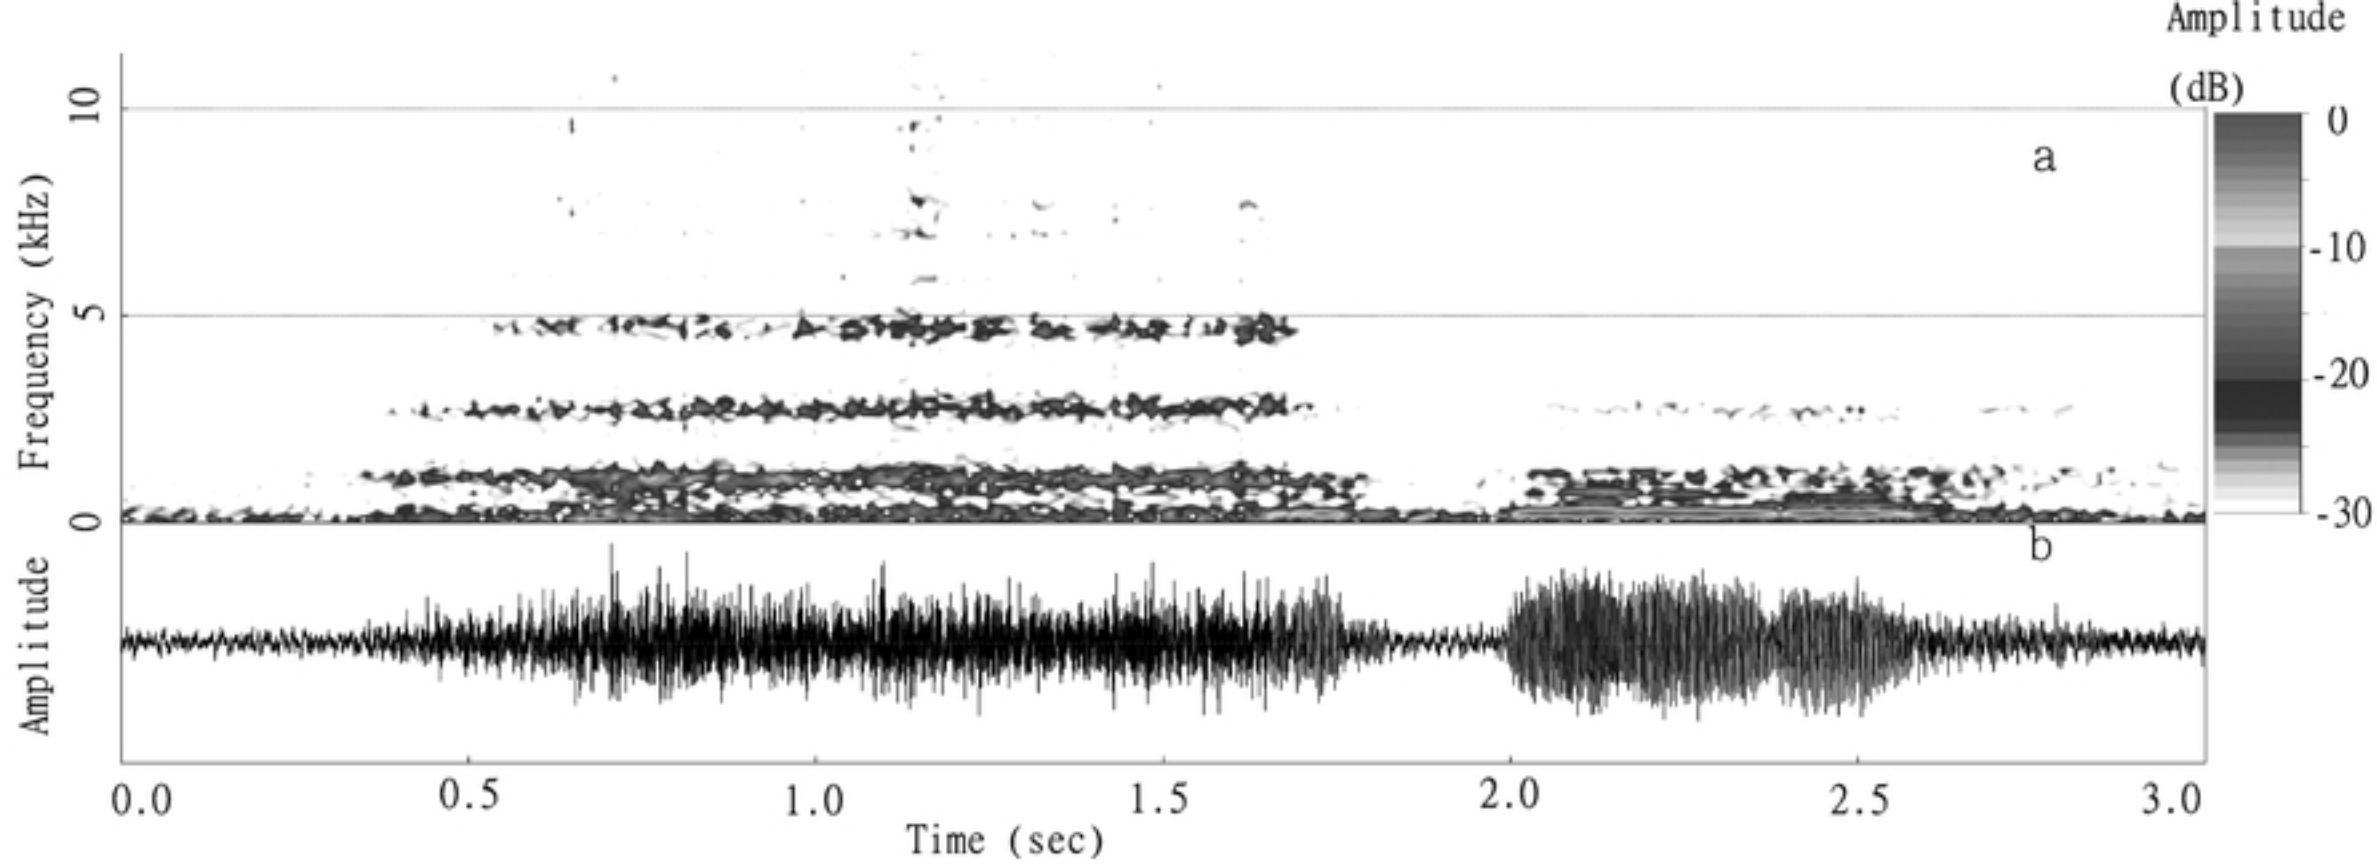

Figure 1

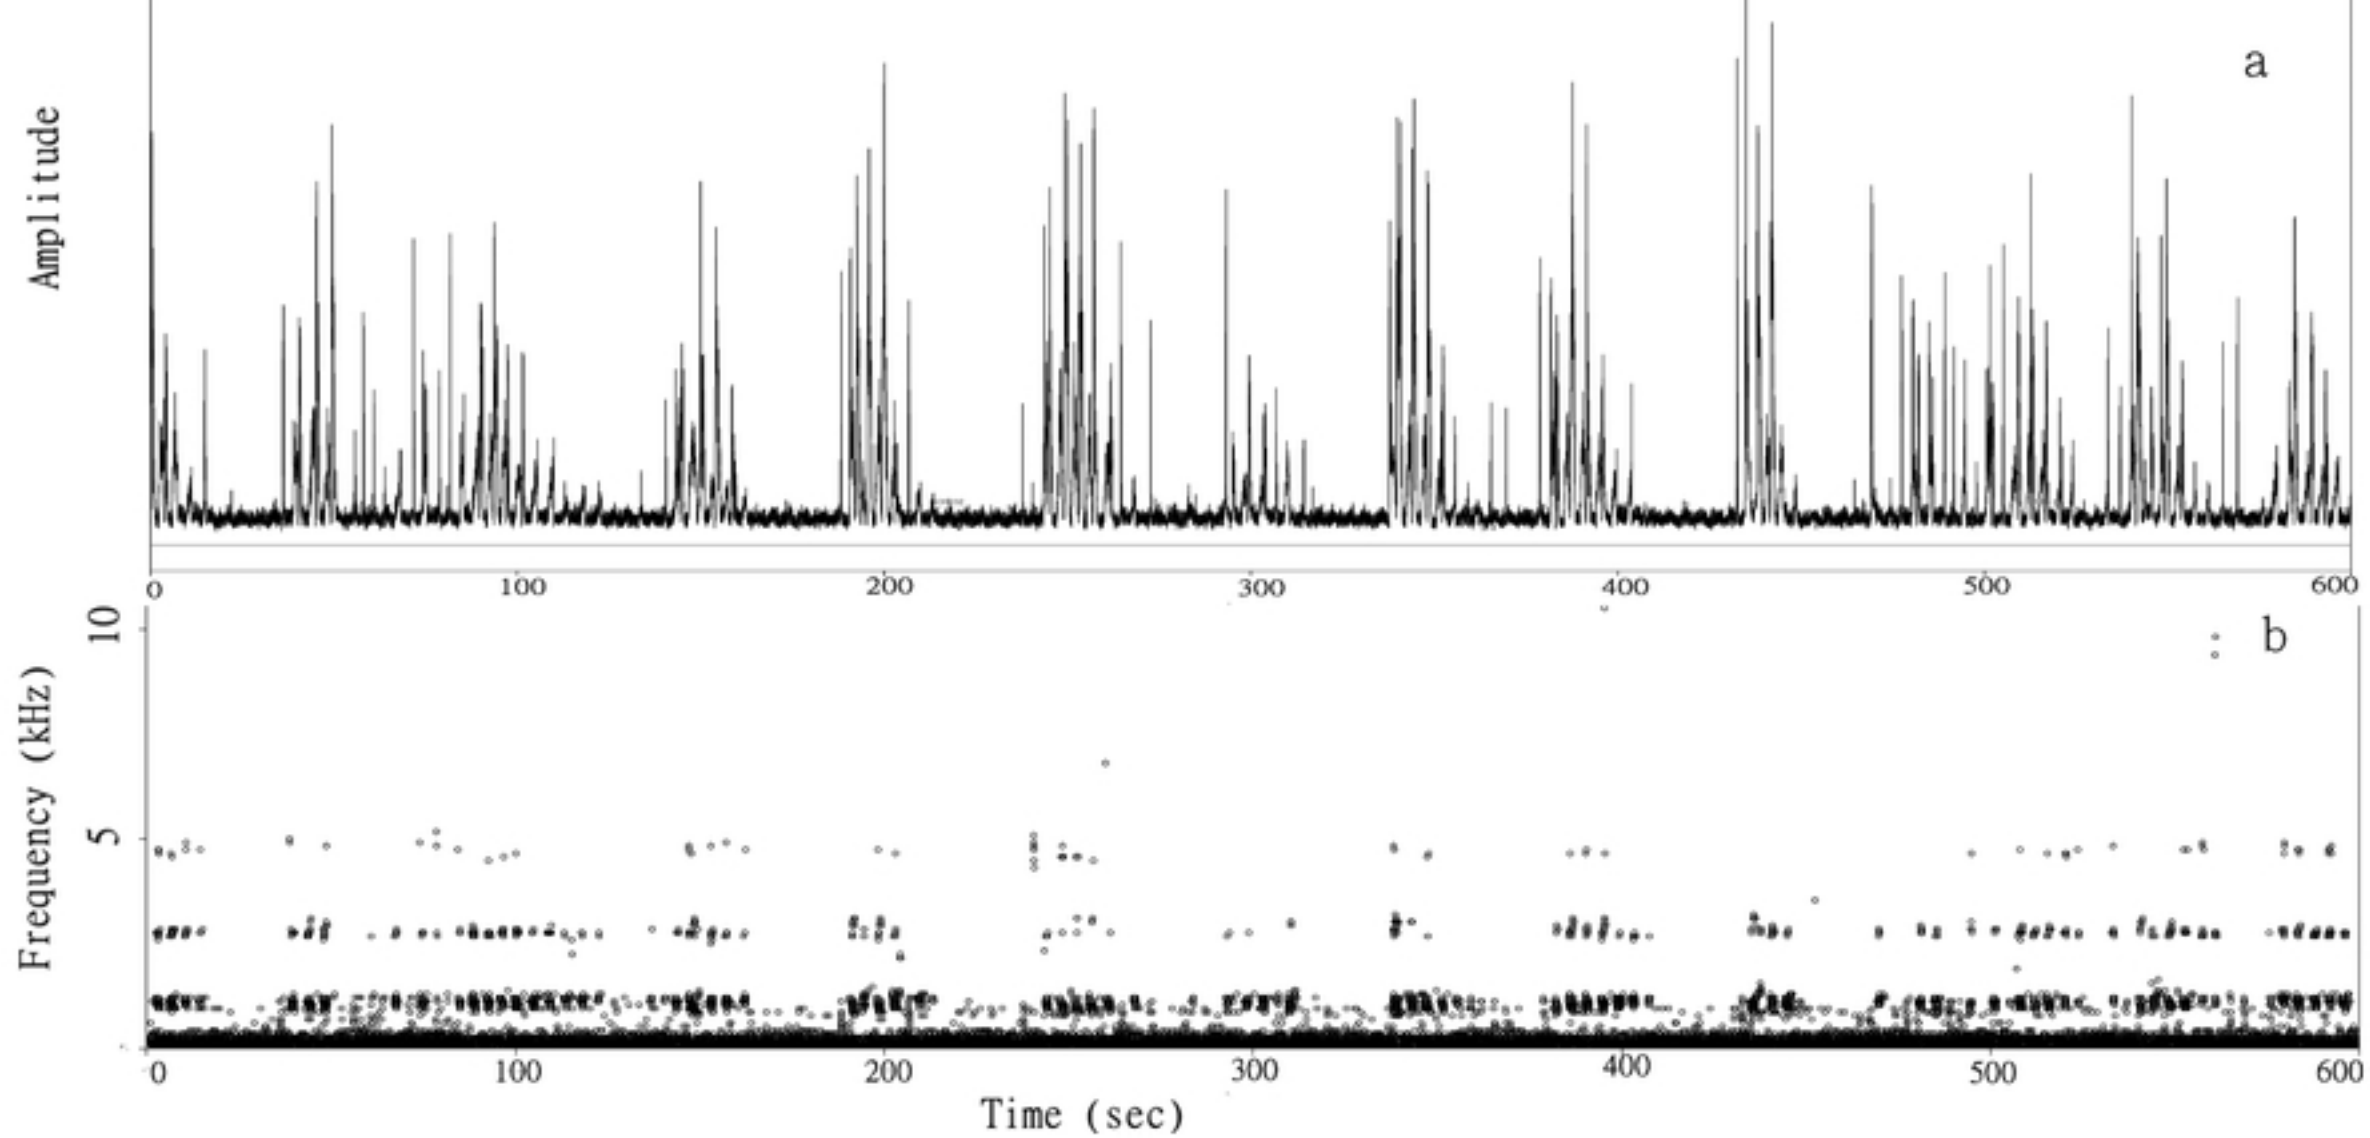

Figure 2



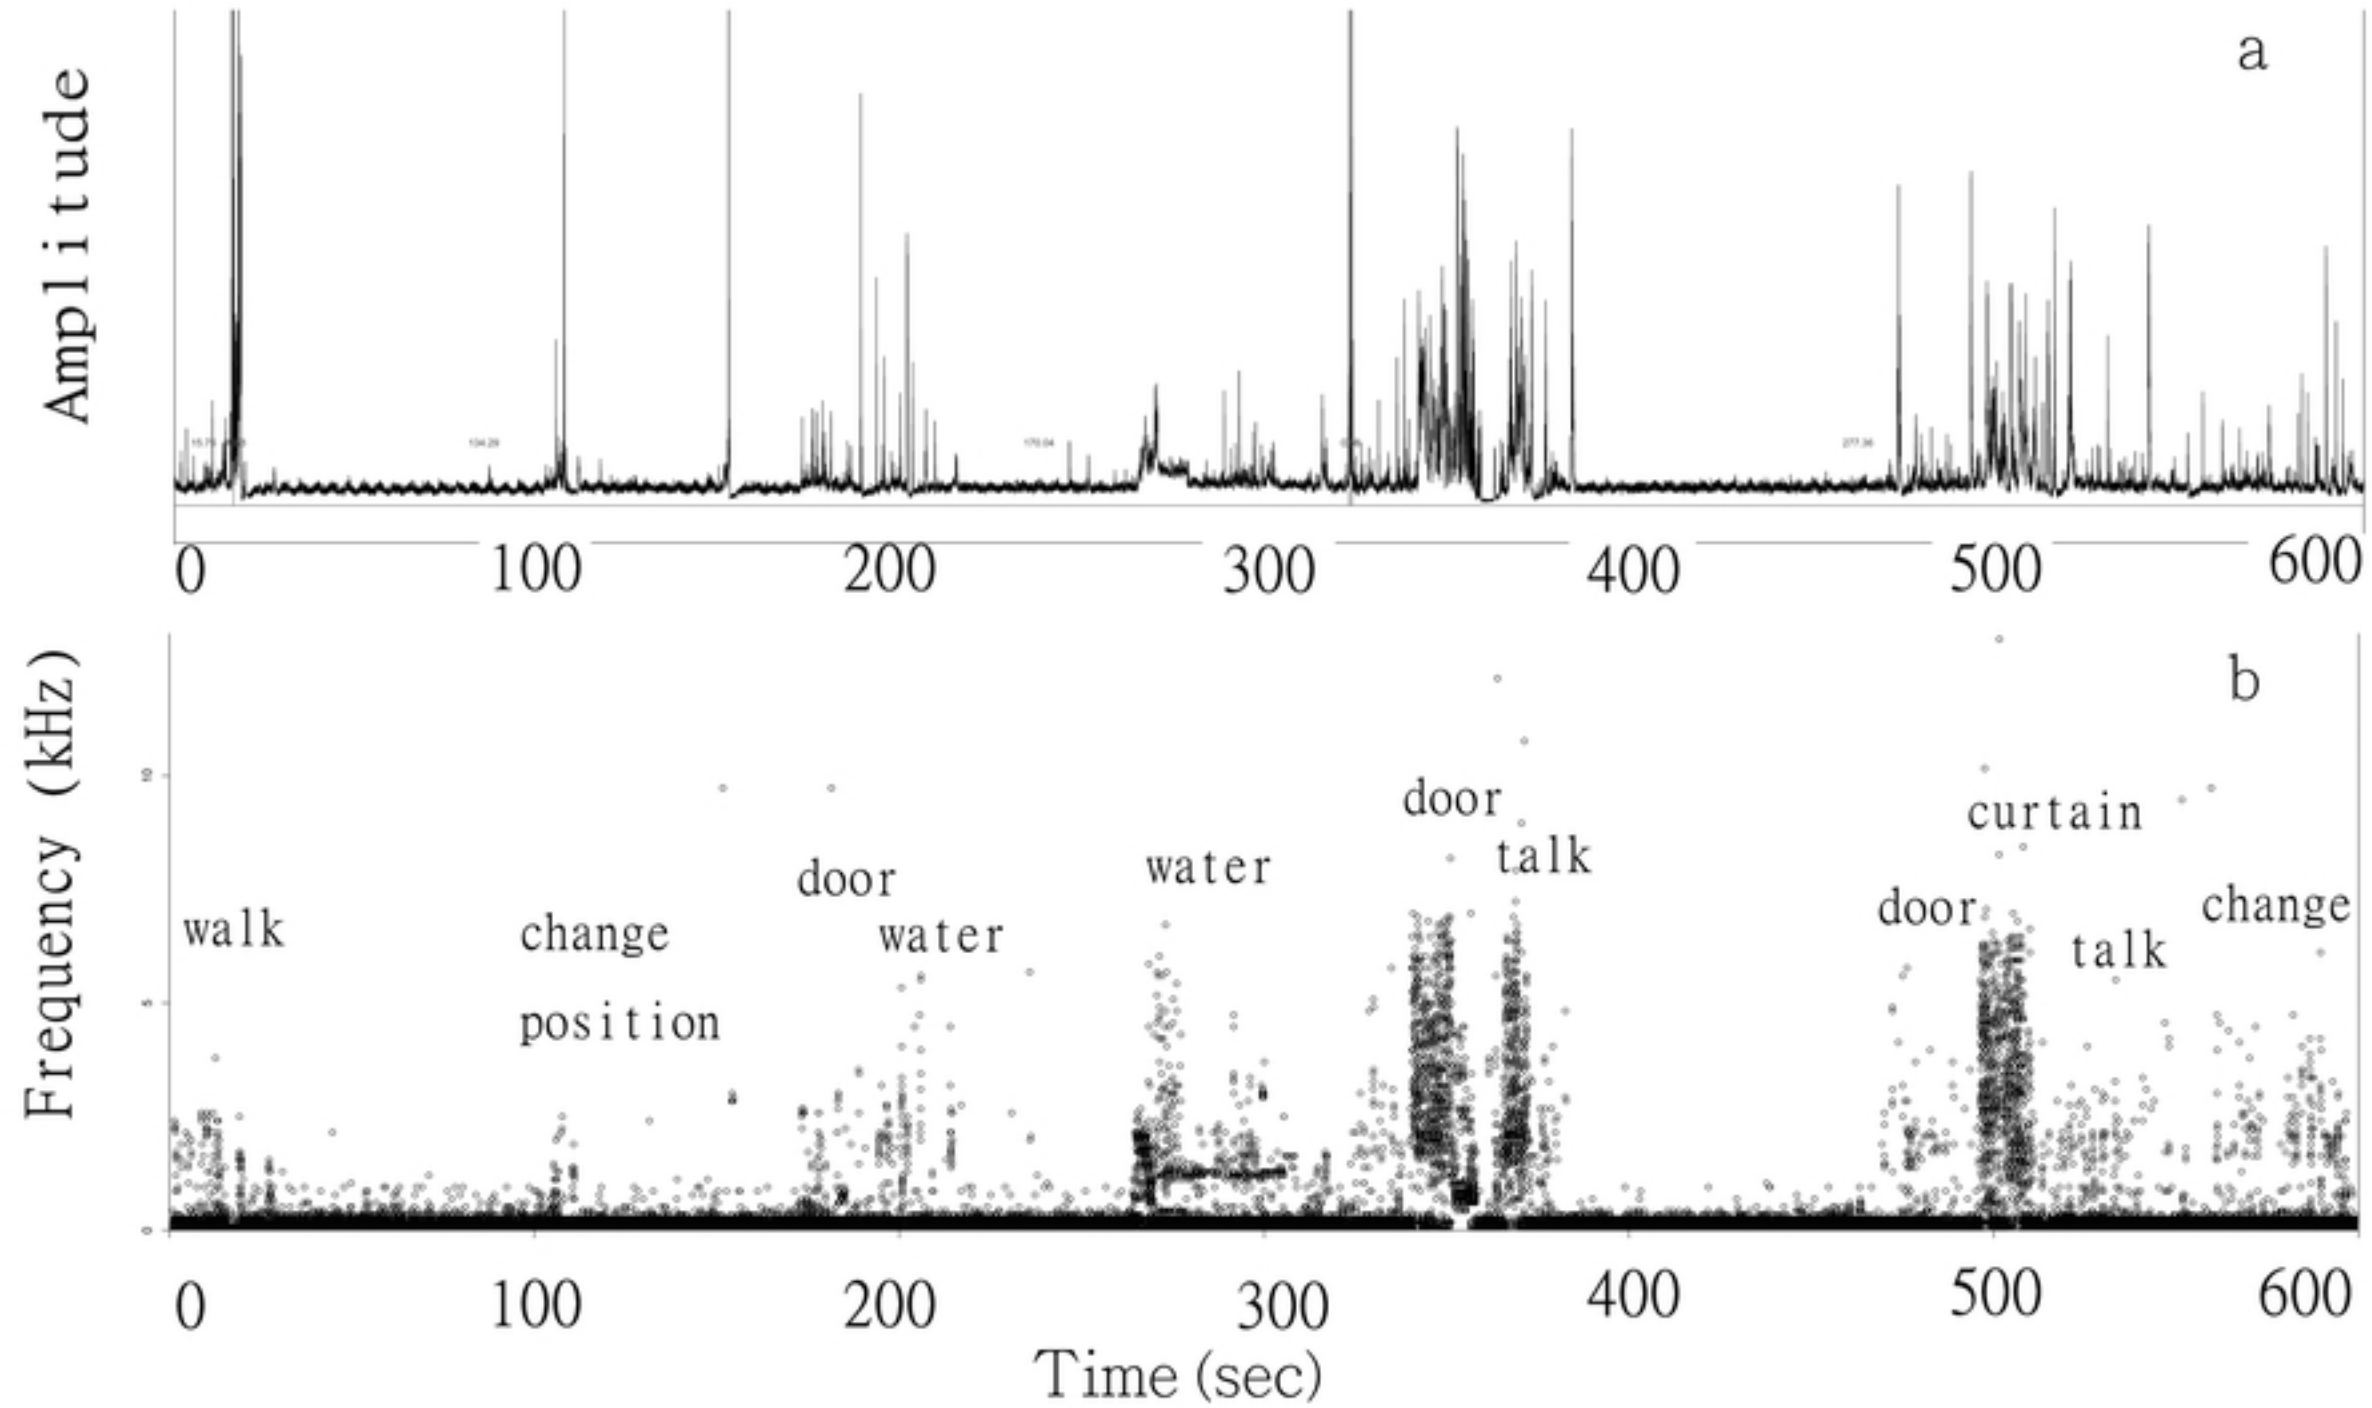

Figure 3

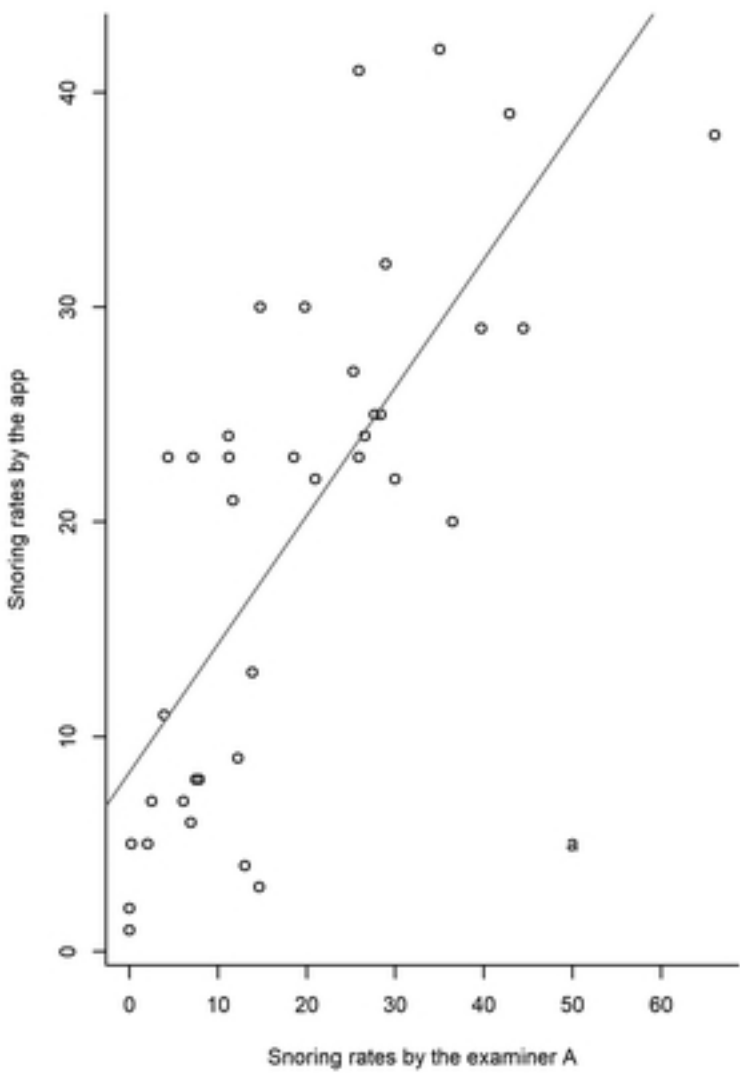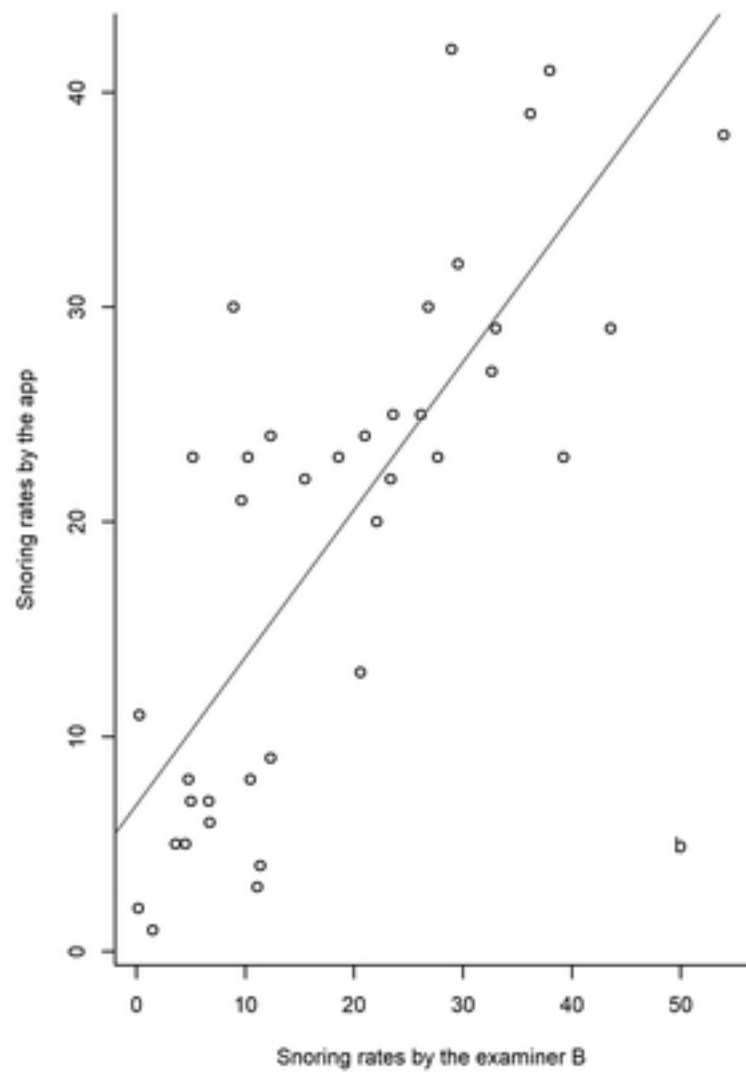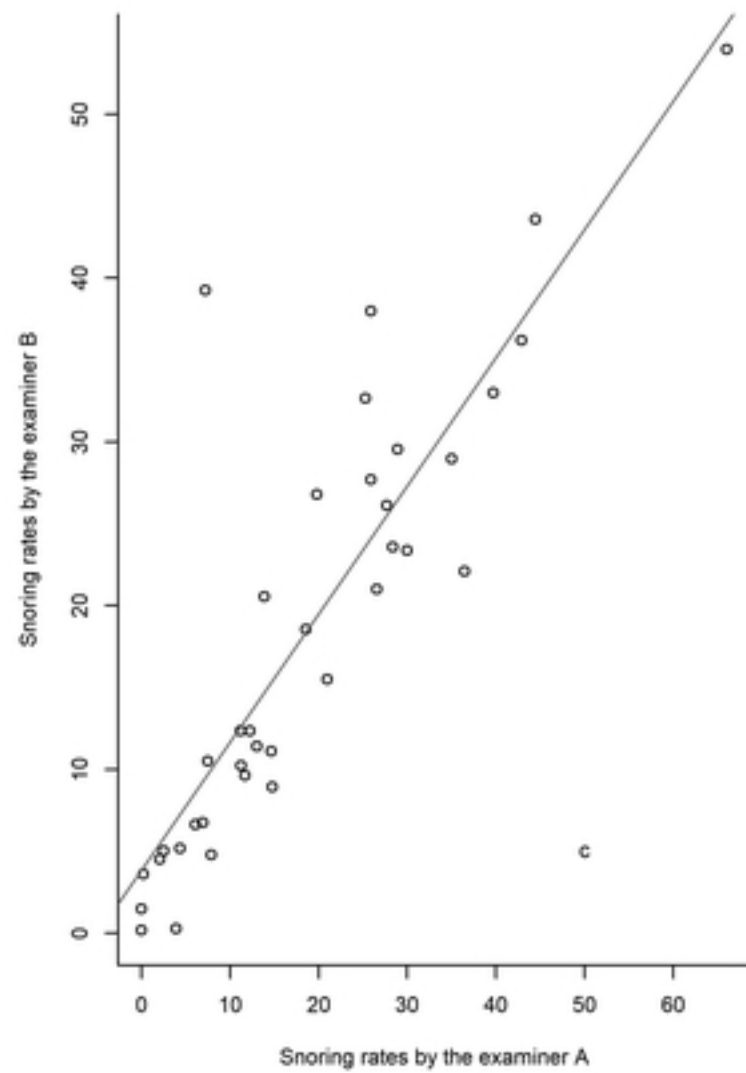

Figure 4

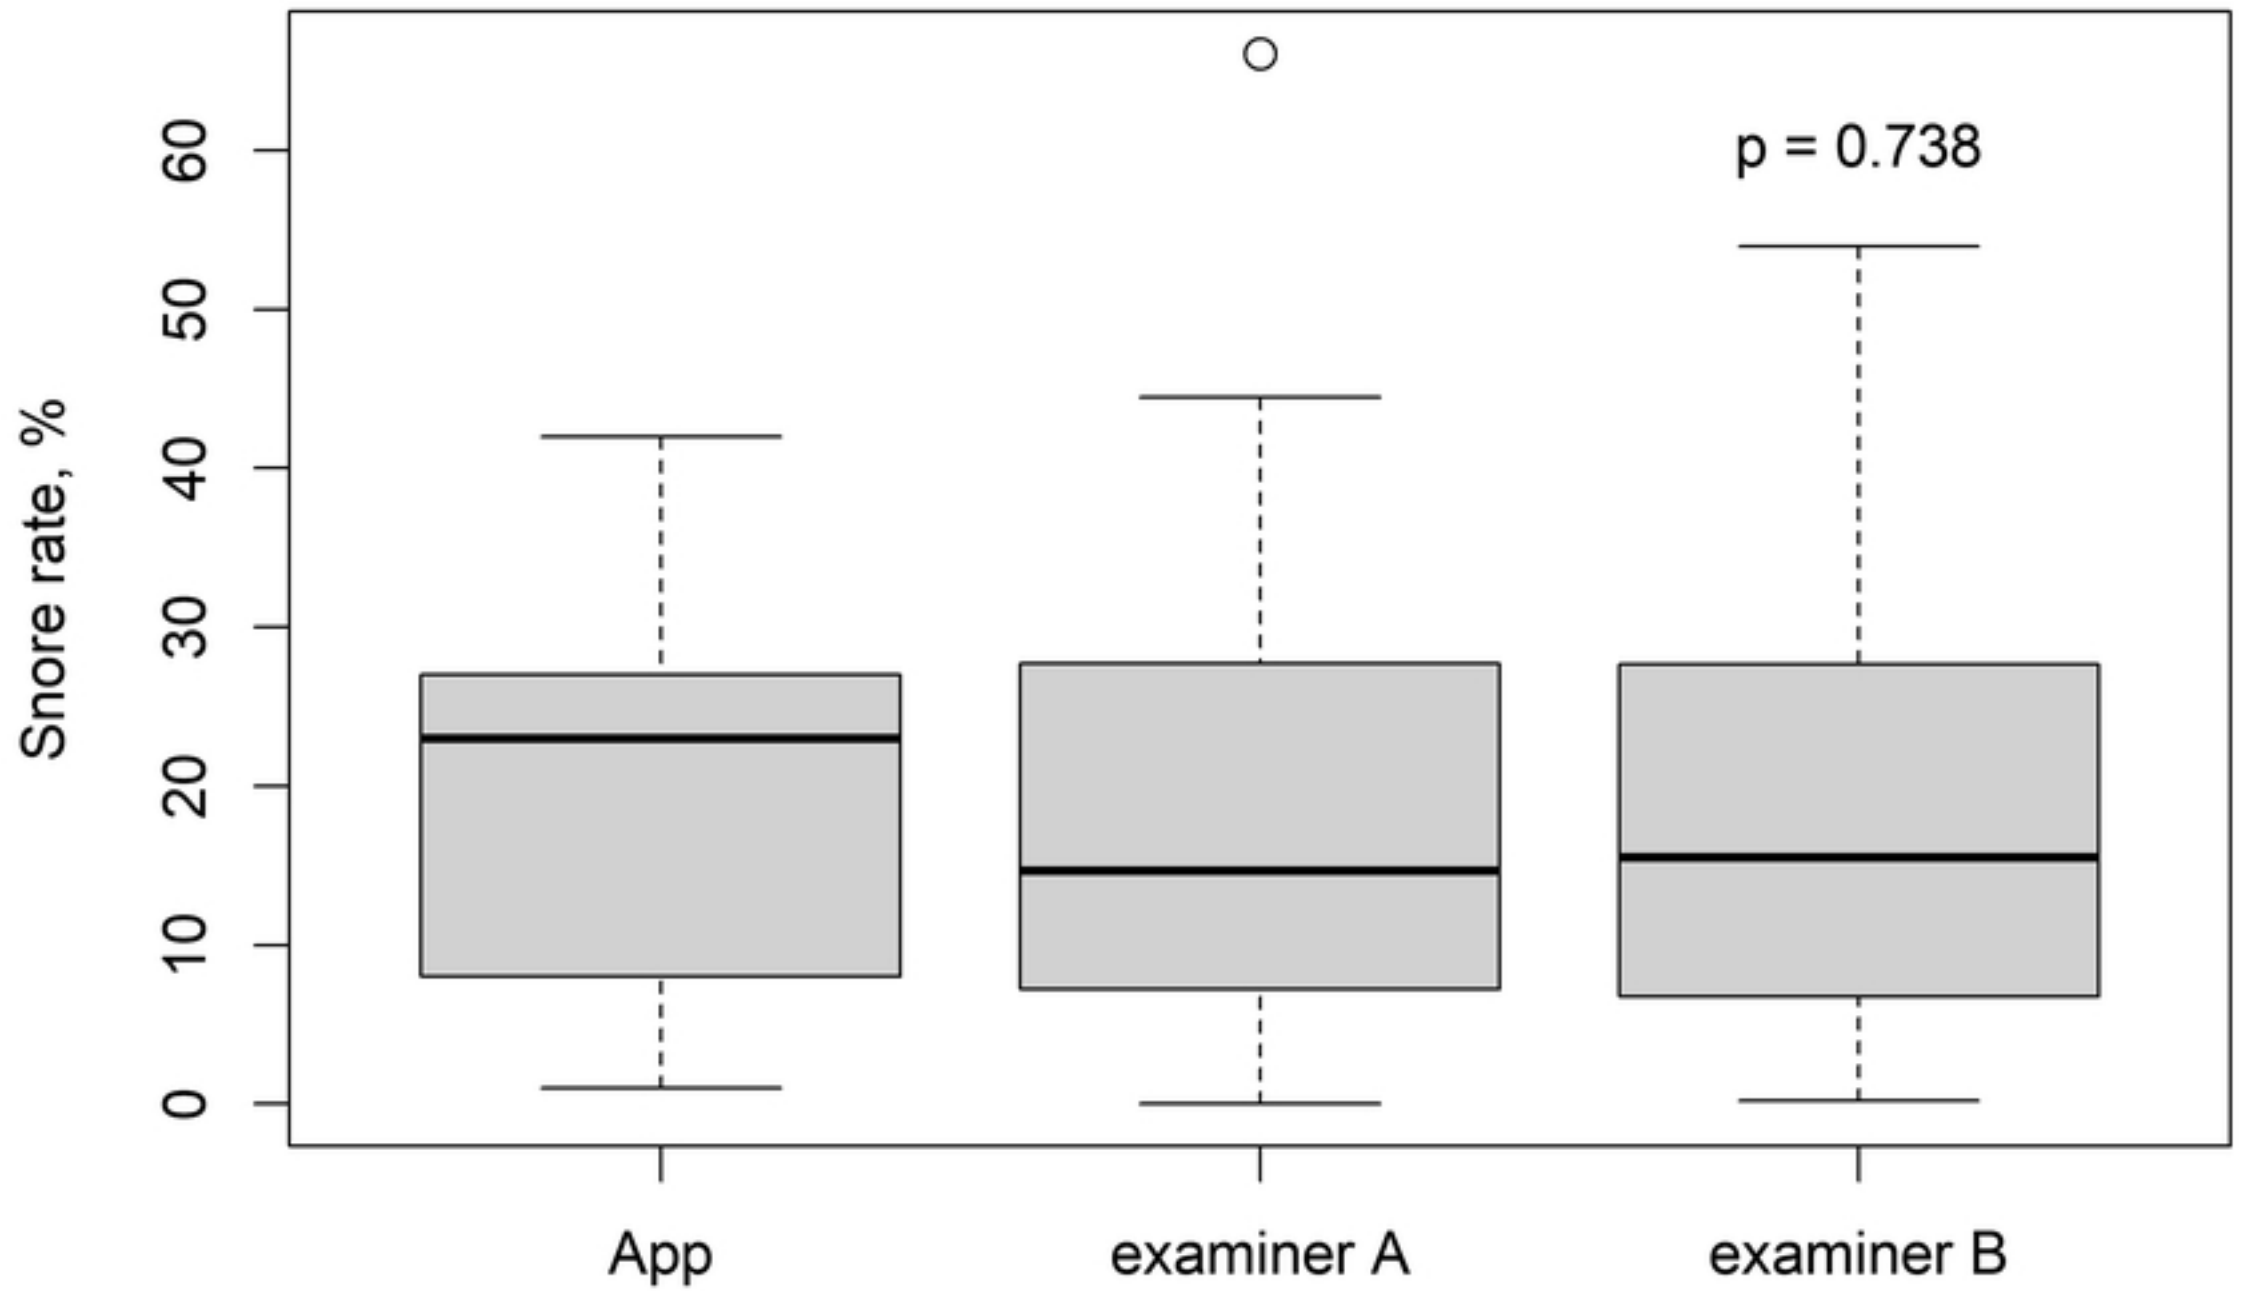

Figure 5
